# Supplementary material
Source: MDPI journal article supplement (https://www.mdpi.com/2071-1050/12/9/3629)
Supplement: s1 [file s1]

**Table S1.** Frequency statistics of typical keywords of China's NEVs policy.

| Dimension  | Keywords                          | Stage 1 | Stage 2 | Stage 3 | Stage 4 |
|------------|-----------------------------------|---------|---------|---------|---------|
| Themes     | Energy saving                     | 713     | 301     | 234     | 243     |
|            | Technology                        | 310     | 242     | 365     | 435     |
|            | Transportation                    | 63      | 25      | 67      | 78      |
|            | Replacing oil with electricity    | 5       | --      | --      | --      |
|            | Structural adjustment             | --      | 12      | --      | --      |
|            | Market concentration              | --      | 18      | --      | --      |
|            | Public service                    | --      | 20      | 65      | 78      |
|            | Private purchase                  | --      | --      | 72      | 83      |
|            | Innovation                        | --      | --      | 354     | 365     |
|            | Pure electric drive               | --      | --      | 56      | 167     |
|            | Industrial classification         | --      | --      | --      | 231     |
|            | Industrialization level           | --      | --      | --      | 241     |
|            | Recycle and re-use                | --      | --      | --      | 231     |
| objectives | NEVs related concept*             | 66      | 41      | --      | --      |
|            | NEVs                              | --      | 286     | 742     | 987     |
|            | power battery                     | --      | --      | 102     | 453     |
| processes  | Whole vehicle                     | 55      | 45      | 36      | 67      |
|            | Auto parts                        | 58      | 39      | 32      | 40      |
|            | Investment                        | 19      | 21      | 41      | 45      |
|            | RD                                | 4       | 9       | 32      | 42      |
|            | Investment management             | --      | 42      | 44      | 43      |
|            | Production permission             | --      | 46      | 50      | 43      |
|            | Product design                    | --      | 15      | 32      | 37      |
|            | Product review                    | --      | 29      | 23      | 32      |
|            | After-sales service               | --      | 14      | 20      | 41      |
|            | Core technologies                 | --      | --      | 231     | 271     |
|            | Integrated platform construction  | --      | --      | 145     | 150     |
|            | Methanol vehicles related process | --      | --      | --      | 234     |
| Measures   | Guidance catalogs                 | 25      | 23      | 22      | 24      |
|            | National standards                | 9       | 5       | --      | --      |
|            | Fuel tax reforms                  | 4       | 4       | --      | --      |
|            | Official car reforms              | 7       | 4       | 8       | 10      |
|            | Industry standard system**        | --      | 60      | 237     | 342     |
|            | Pilot                             | --      | 20      | 324     | 356     |
|            | Demonstration projects            | --      | 30      | 325     | 234     |
|            | Supervision and management        | --      | --      | 295     | 267     |
|            | Fiscal and tax subsidies          | --      | --      | 345     | 354     |

--notes policy does not involve this topic. \* includes energy-saving and environmentally-friendly vehicles, small-displacement vehicles, new fuel vehicles, new power vehicles, clean fuel vehicles, and electric vehicles. \*\*is but not limited to automobile fuel consumption limit standards, automobile fuel

economy standards, energy-saving standards, mandatory declaration, announcement, and labeling system performance, and so on.
